# Supplementary material for: Genomic Characterization and Expression Analysis of the SnRK Family Genes in Dendrobium officinale Kimura et Migo (Orchidaceae)
Source: MDPI journal article supplement (doi:10.3390/plants10030479), 2021-03-03
Supplement: s1 [file s1]

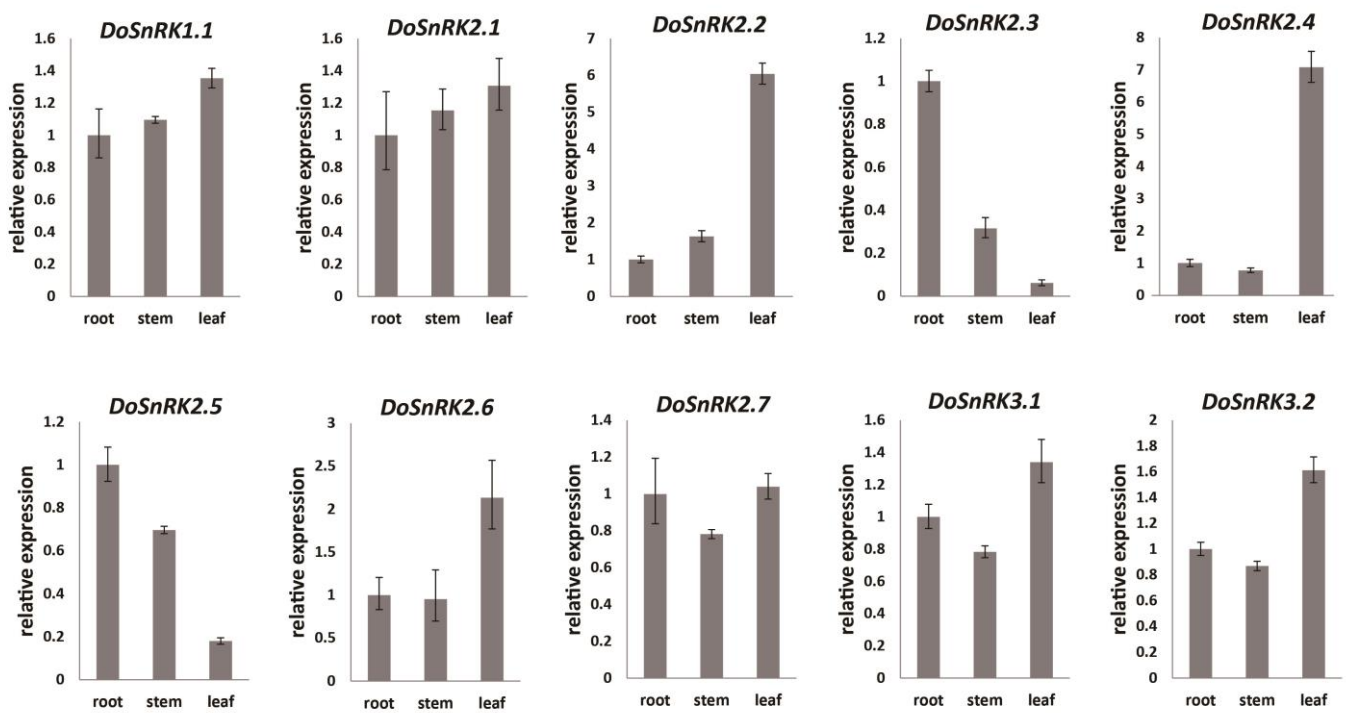

**Figure S1.** Expression profiles of 10 *DoSnRK* genes in leaf, stem, and root tissues by qRT-PCR assay. The relative expression levels were obtained from the average of three repeats. The bars stand for the standard deviation.
