# Supplementary material for: Genomic Characterization and Expression Analysis of the SnRK Family Genes in Dendrobium officinale Kimura et Migo (Orchidaceae)
Source: Plants (Basel). 2021 Mar 3;10(3):479. doi: 10.3390/plants10030479 (PMC8000535; doi:10.3390/plants10030479)
Supplement: Supplementary file 1 [file plants-10-00479-s001.zip]

Archive with 4 entries (3 files):
- Supplementary files/Table S1.xlsx
- Supplementary files/Table S2.xlsx
- Supplementary files/
- Supplementary files/Figure S1.pdf
