# Supplementary material for: Genomic Characterization and Expression Analysis of the SnRK Family Genes in Dendrobium officinale Kimura et Migo (Orchidaceae)
Source: Plants (Basel). 2021 Mar 3;10(3):479. doi: 10.3390/plants10030479 (PMC8000535; doi:10.3390/plants10030479)
Supplement: Supplementary file 1 [file plants-10-00479-s001.zip › Supplementary files/Table S1.xlsx]

## Sheet: Sheet1
	CGTCA-motif	TGACG-motif	ABRE	ERE	TGA-element	TCA-element	ARE	CAT-box	O2-Site	G-box	TC-rich repeats	WUN-motif	LTR	MBS
DoSnRK3.22			4				3	2		6		3		1
DoSnRK3.23			1	2						1				1
DoSnRK3.26	1	1	2	1		1	1	1		2	1			3
DoSnRK3.25	5	5	3	3	1		1	1		4	1	1
DoSnRK3.24	3	3	2	3	1	3	1	1		1	1	1	1
DoSnRK3.19			2	2		3	1	1			2	3	2
DoSnRK3.21	1	1	3				1	2		4	1
DoSnRK3.1					1	2	2						1
DoSnRK3.7	1	1	1	2		1	1			1		1		1
DoSnRK3.2	5	5	3	1		1	1			1		1		1
DoSnRK3.3	1	1	1	2	1				1	1
DoSnRK3.8				3	2					1	1	1	1
DoSnRK3.11	4	4	3	3			2	1		3		2	1
DoSnRK3.9	3	3	3	4			2			4		1
DoSnRK3.4	2	2	5	3			2	2		4			2	1
DoSnRK3.5	2	2		2			2			1		1	1	1
DoSnRK3.10				4		1	3	2
DoSnRK3.12	4	4	1	2		1	3		1	2			1
DoSnRK3.20	2	2	1				2			1
DoSnRK3.27	2	2	9	2	1		2	1	1	7	1	1
DoSnRK3.28	4	4	3			1	1			3				1
DoSnRK3.13	2	2	4	4		3	3	1	3	3	1		1	1
DoSnRK3.15	2	2			1	1	2		1			1
DoSnRK3.17	1	1	1	5			2	1				2
DoSnRK3.14	2	2	1	4			1	2		2		1	1	1
DoSnRK3.18			1	1				1		3			1	1
DoSnRK3.16						1		2	1		1			1
DoSnRK3.6	3	3	1	2	4	2	1		2					2
DoSnRK1.1	1	1	1	4			2			2	1			1
DoSnRK2.6				1			2			1		2	1
DoSnRK2.7				1	1		1	1			1	1
DoSnRK2.5	4	4	1	2	1			1		1		2
DoSnRK2.1			3	1	1					2	2
DoSnRK2.2	4	4	4		1		3	2		2			1
DoSnRK2.3	3	3	1			1	4			1	1	2	1
DoSnRK2.4	3	3	4	6		2		2		6		2	3	1
	65	65	69	70	16	24	52	27	10	70	15	29	19	18
