# Supplementary material for: Genomic Characterization and Expression Analysis of the SnRK Family Genes in Dendrobium officinale Kimura et Migo (Orchidaceae)
Source: Plants (Basel). 2021 Mar 3;10(3):479. doi: 10.3390/plants10030479 (PMC8000535; doi:10.3390/plants10030479)
Supplement: Supplementary file 1 [file plants-10-00479-s001.zip › Supplementary files/Table S2.xlsx]

## Sheet: Sheet1
DoSnRK1.1 F	ACATCCATGGTTCCAAGCTC
DoSnRK1.1 R	CACAGTCGCCTCATTTTGAA
DoSnRK2.1 F	GGCCAAAGTCAACAGTAGGC
DoSnRK2.1 R	ATCGTCCGGATCTTCAAATG
DoSnRK2.2 F	AGCGAGGATGAAGCGAGATA
DoSnRK2.2 R	GCCTCGAGTGCAGTAAGGAC
DoSnRK2.3 F	CGTTGCCGTCAAACATATTG
DoSnRK2.3 R	CAGATCCGCTCGAAAAGTTC
DoSnRK2.4 F	TATGATGGCGAGATTGCTGA
DoSnRK2.4 R	CAAAAGATGCCTGCAATGAA
DoSnRK2.5 F	CTGGTGGGGAGCTATTTGAA
DoSnRK2.5 R	GTGCAGGACTTCCATCCAAT
DoSnRK2.6 F	AATGCTGGTGGGAGCATATC
DoSnRK2.6 R	GGCAGGATTGGCTACAAAAA
DoSnRK2.7 F	CAGGAGCCTGATCAACCAAT
DoSnRK2.7 R	CGACATCAAGCTCTGGATCA
DoSnRK3.1 F	TTATGAGGTCATGGCAAGCA
DoSnRK3.1 R	AAGCAAGTTCTCGGGTTTCA
DoSnRK3.10 F	CTGCGGAGTAATCCTCTTCG
DoSnRK3.10 R	GGAATGGTGATTCGAGTGCT
DoSnRK3.11 F	TTCGAGGAAGGGATACGATG
DoSnRK3.11 R	TAGCCGCGAGAGAAGCTTAG
DoSnRK3.12 F	GAGCTTGGAAGGGACTAGGG
DoSnRK3.12 R	CCCGGTTTTAATTCCCTGTT
DoSnRK3.13 F	TGTTCGGCAAGTACGAGATG
DoSnRK3.13 R	AGATCTCGCGCTGAATTTGT
DoSnRK3.14 F	AATTTCCGACTTTGGGCTTT
DoSnRK3.14 R	CAGCGAGGAGAACGTAGAGG
DoSnRK3.15 F	CAAAAATCCCGAGACCAGAA
DoSnRK3.15 R	GCTGTCTTTCCTCAGCATCC
DoSnRK3.16 F	CGGAGATTACCAATGCCCTA
DoSnRK3.16 R	CCTTTCCTTCCTCCTGGAAC
DoSnRK3.18 F	CTTCCACCGAGATCTCAAGC
DoSnRK3.18 R	GCCATCGTACCCTTTCTTCA
DoSnRK3.2 F	GGGGTTTATCATCGGGATCT
DoSnRK3.2 R	CTTTTGCGCCATCATATCCT
DoSnRK3.21 F	GGAGCAAAATCCCTGGTACA
DoSnRK3.21 R	GGGGTCATCAAAAACAGCAT
DoSnRK3.22 F	GCGAATCTTGTTGTTGAGCA
DoSnRK3.22 R	TTCAGCAGGCAGTTTTGATG
DoSnRK3.23 F	ATCGATGACCTCGAAAGTGG
DoSnRK3.23 R	GAGGACCTGGTTCTTGTCCA
DoSnRK3.24 F	ACAGCAGGGGTGTCTACCAC
DoSnRK3.24 R	ATTTGGAGTTCCGCACGTAG
DoSnRK3.3 F	ATCTGTCCGGCTTGTTTGAG
DoSnRK3.3 R	GGCCTTCTTTTGATCCTTCC
DoSnRK3.4 F	GGAGCATCCTTGGTTCAAAA
DoSnRK3.4 R	CAAATCCAGCCGAAAGAGAG
DoSnRK3.5 F	TTGGGACAAGGAACTTTTGC
DoSnRK3.5 R	GGATGCCTCACCAATCTCAT
DoSnRK3.8 F	GATCCCTTCCCTTCCAAGAC
DoSnRK3.8 R	TGGGGTTTTTCTTGAACCAG
DoSnRK3.9 F	TCTGTACCGGGAAAAACGTC
DoSnRK3.9 R	TTTGGATATCGTTGCCATCA
